# Supplementary material for: Electrically erasable multi-level charge trapping memory with metal nanoparticle engineering for organic synaptic transistors
Source: Royal Society of Chemistry journal article supplement (doi:10.1039/d5tc00997a), 2025-01-01
Supplement: d5tc00997a1.pdf [file d5tc00997a1.pdf]

Supporting Information

# Electrically Erasable Multi-Level Charge Trapping Memory with Metal Nanoparticle Engineering for Organic Synaptic Transistors

*Yujeong Hwang,<sup>†</sup> Yeon-Woo Lee,<sup>‡</sup> Chang-Hyun Kim,<sup>||</sup> Hea-Lim Park,<sup>‡, \*</sup> and Min-Hoi Kim<sup>†, \*</sup>*

<sup>†</sup> Department of Creative Convergence Engineering, Hanbat National University, Daejeon 34158,

Republic of Korea

<sup>‡</sup> Department of Materials Science and Engineering, Seoul National University of Science and

Technology, Seoul 01811, Republic of Korea

<sup>||</sup> School of Electrical Engineering and Computer Science, University of Ottawa, Ottawa, ON

K1N 6N5, Canada

Corresponding Author

\*Email: parkhl21@seoultech.ac.kr (H.-L. Park), mhkim8@hanbat.ac.kr (M.-H. Kim).

## SUPPLEMENTARY FIGURES

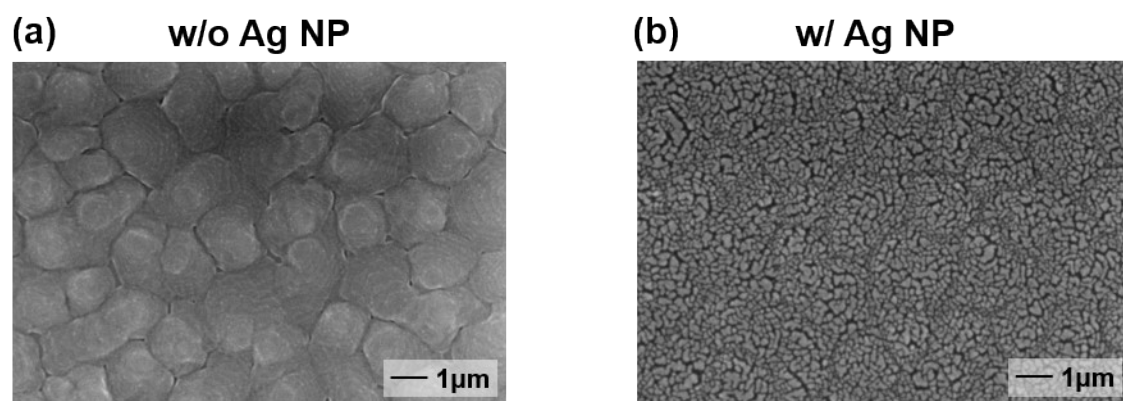

**Figure S1.** Scanning electron microscopy images of the surface morphology of (a) pentacene and (b) 5-nm-thick Ag NPs deposited on pentacene.

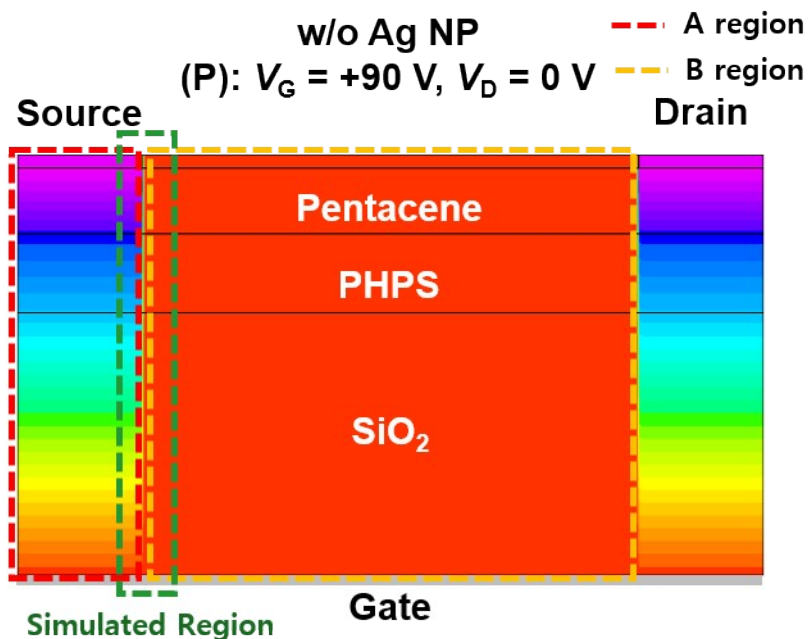

**Figure S2.** Numerical simulation of the electrical potential distribution of the entire device without Ag NPs under an erasing voltage ( $V_{G, \text{Bias}} = +90$  V). Region A indicates the region where the S/D and gate electrode overlap (red dotted line), while region B indicates the region where the gate electrode overlaps the channel without overlapping the S/D. For Fig. 2c, the simulations were performed on a portion of the source electrode and in a 200-nm-wide region near the source electrodes (green dotted box).

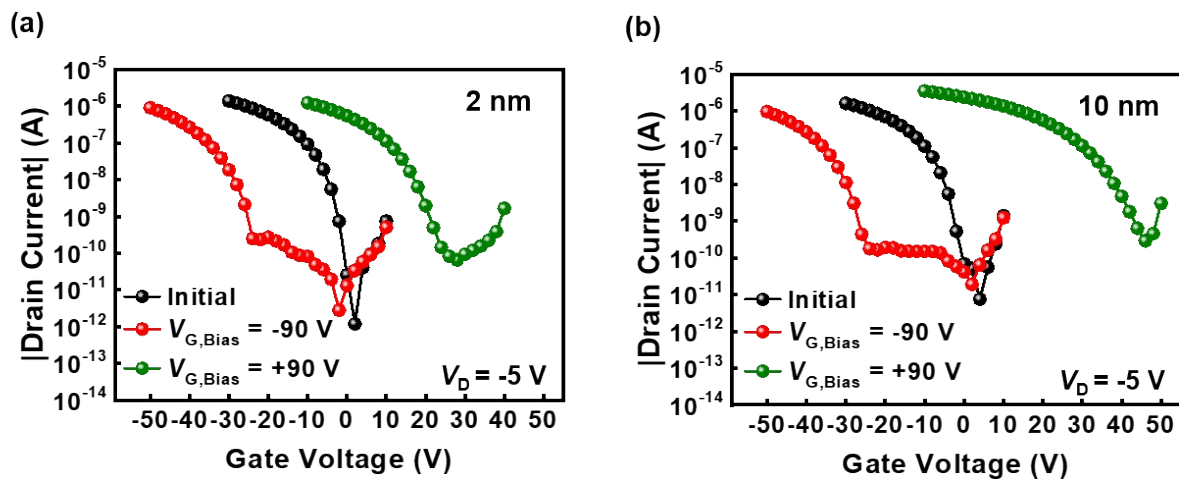

**Figure S3.** Transfer curves of devices incorporating (a) 2-nm- and (b) 10-nm-thick Ag NPs after the writing (red lines) and erasing (green lines) processes. The black lines represent the initial transfer curves of both devices.

**(a) 10-nm-thick Ag NP**

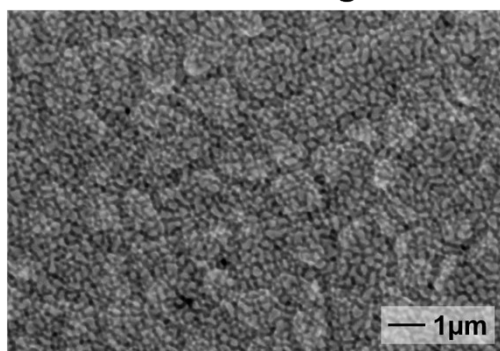

**(b) 15-nm-thick Ag NP**

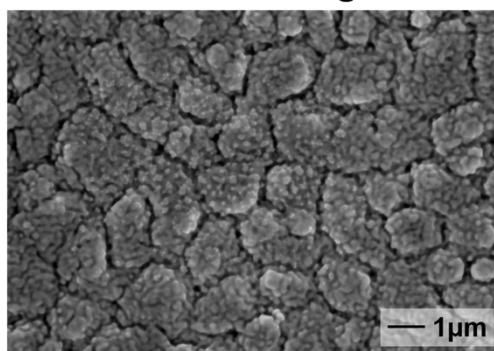

**Figure S4.** Scanning electron microscopy images of the surface morphology of (a) 10-nm-thick and (b) 15-nm-thick Ag NPs deposited on pentacene.

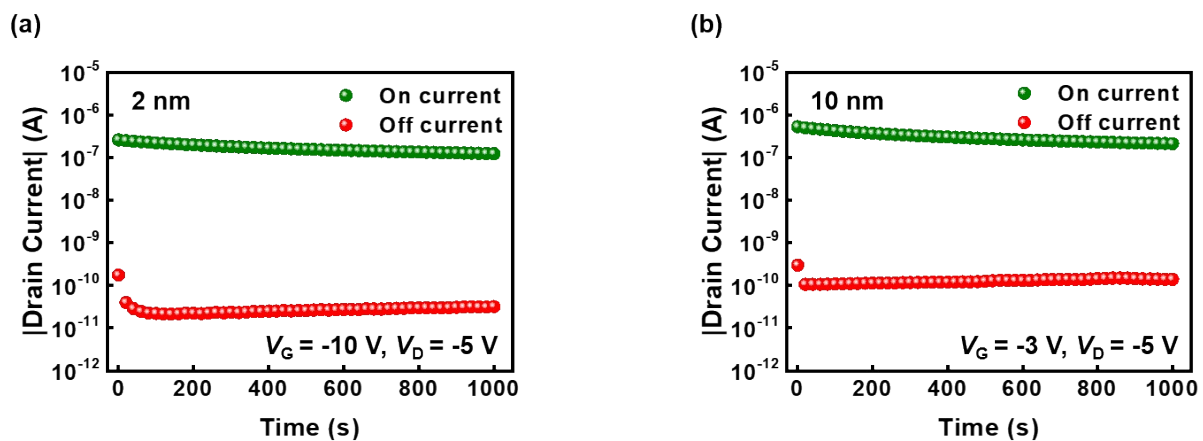

**Figure S5.** The retention characteristics of OSTs with (a) 2-nm and (b) 10-nm thick Ag NPs.

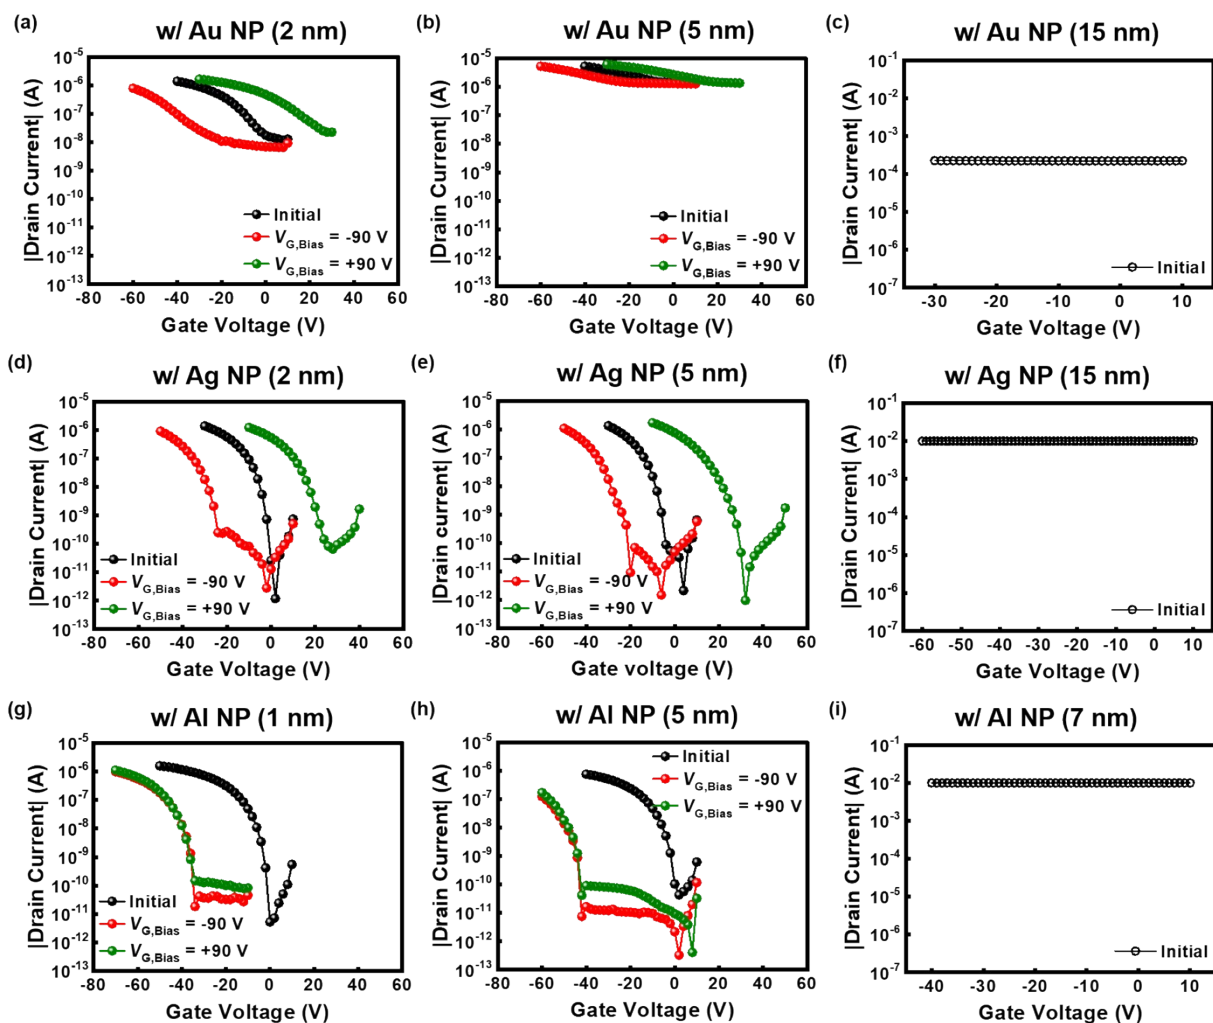

**Figure S6.** Electrical characteristics of NP-based OSTs with three different metal electrodes (Au, Ag, and Al) as a function of deposition thickness after the writing (depression) and erasing (potentiation) processes.

| Materials<br>(Gate/Gate insulator/<br>CTL <sup>a</sup> /<br>semiconductor/SD <sup>b</sup> )             |  |  |  |  |  | Table S1. |
|---------------------------------------------------------------------------------------------------------|--|--|--|--|--|-----------|
| Memory window [V]                                                                                       |  |  |  |  |  | Co        |
| Number of states (potentiation / depression)                                                            |  |  |  |  |  | mpa       |
| Conductance ratio ( $G_{\max}/G_{\min}$ )                                                               |  |  |  |  |  | riso      |
| Energy consumption [J]                                                                                  |  |  |  |  |  | n of      |
| [Ref]                                                                                                   |  |  |  |  |  | olig      |
| Ag/Al <sub>2</sub> O <sub>3</sub> /<br>C60/PMMA hybrid layer/<br>Pentacene/Au                           |  |  |  |  |  | ome       |
| ~ 0.7                                                                                                   |  |  |  |  |  | ric       |
| 10 / 10                                                                                                 |  |  |  |  |  | syna      |
| ~ 1.2                                                                                                   |  |  |  |  |  | ptic      |
| ~ $1.4 \times 10^{-7}$                                                                                  |  |  |  |  |  | tran      |
| [1]                                                                                                     |  |  |  |  |  | sisto     |
| Substrate/ITO/Al <sub>2</sub> O <sub>3</sub> /<br>PVPy <sup>c</sup> @MOF <sup>d</sup> /<br>Pentacene/Au |  |  |  |  |  |           |
| ~ 1.5                                                                                                   |  |  |  |  |  |           |
| 20 / 20                                                                                                 |  |  |  |  |  |           |
| ~ 3                                                                                                     |  |  |  |  |  |           |
| ~ $0.6 \times 10^{-7}$                                                                                  |  |  |  |  |  |           |
| [2]                                                                                                     |  |  |  |  |  |           |
| Si/SiO <sub>2</sub> /<br>BP <sup>e</sup> -ZnO hybrid NP/<br>Pentacene/Au                                |  |  |  |  |  |           |
| ~ 10                                                                                                    |  |  |  |  |  |           |
| 25 / 25                                                                                                 |  |  |  |  |  |           |
| ~ 1.4                                                                                                   |  |  |  |  |  |           |
| ~ $1.8 \times 10^{-6}$                                                                                  |  |  |  |  |  |           |
| [3]                                                                                                     |  |  |  |  |  |           |
| Si/SiO <sub>2</sub> /<br>Polyimide/<br>Pentacene/Au                                                     |  |  |  |  |  |           |
| 84                                                                                                      |  |  |  |  |  |           |
| -                                                                                                       |  |  |  |  |  |           |
| -                                                                                                       |  |  |  |  |  |           |
| -                                                                                                       |  |  |  |  |  |           |
| [4] <sup>f</sup>                                                                                        |  |  |  |  |  |           |
| Si/SiO <sub>2</sub> /<br>PHPS <sup>g</sup> /<br>pentacene/Au                                            |  |  |  |  |  |           |
| 54<br>(Max 64 <sup>h</sup> )                                                                            |  |  |  |  |  |           |
| 30 / 30                                                                                                 |  |  |  |  |  |           |
| ~ 6                                                                                                     |  |  |  |  |  |           |
| ~ $7.5 \times 10^{-9}$                                                                                  |  |  |  |  |  |           |
| This work                                                                                               |  |  |  |  |  |           |

rs exhibiting potentiation/depression characteristics solely controlled by electrical pulses.



<sup>a</sup>CTL: charge trapping layer; <sup>b</sup>SD: source and drain electrodes; <sup>c</sup>PVPy: polyvinyl pyrrolidone; <sup>d</sup>MOF: metal–organic frameworks of Zn-TCPP (TCPP: tetrakis(4-carboxyphenyl)porphyrin); <sup>e</sup>BP: black phosphorus; <sup>f</sup>The demonstrated device was originally designed as a memory device rather than a synaptic transistor; therefore, data on potentiation and depression characteristics were not obtained, and energy consumption related to synaptic operation could not be evaluated; <sup>g</sup>PHPS: perhydropolysilazane; <sup>h</sup>The device with a 10-nm-thick Ag nanoparticle layer exhibited a maximum memory window of 64 V.

## References

- [1] Gate-Tunable Synaptic Plasticity through Controlled Polarity of Charge Trapping in Fullerene Composites, *Adv. Funct. Mater.* 28, 1805599 (2018)
- [2] Synaptic Plasticity and Filtering Emulated in Metal–Organic Frameworks Nanosheets Based Transistors, *Adv. Electron. Mater.* 6, 1900978 (2020)
- [3] Artificial Synapses Emulated Through a Light Mediated Organic–Inorganic Hybrid Transistor, *J. Mater. Chem. C*, 7, 48-59 (2019)
- [4] Nonvolatile Transistor Memory Devices Using High Dielectric Constant Polyimide Electrets, *J. Mater. Chem. C*, 1, 3235 (2013)
